# Supplementary material
Source: publisher figshare collection journal article supplement (https://acs.figshare.com/ndownloader/files/3744547)
Supplement: Supplementary file 1 [file 3744547]

 
data_ad1 
 
_audit_creation_method            SHELXL-97 
_chemical_name_systematic 
; 
 ? 
; 
_chemical_name_common             ? 
_chemical_melting_point           ? 
_chemical_formula_moiety          'C23 H20 O2 S'
_chemical_formula_sum 
 'C23 H20 O2 S' 
_chemical_formula_weight          360.45 
 
loop_ 
 _atom_type_symbol 
 _atom_type_description 
 _atom_type_scat_dispersion_real 
 _atom_type_scat_dispersion_imag 
 _atom_type_scat_source 
 'C'  'C'   0.0033   0.0016 
 'International Tables Vol C Tables 4.2.6.8 and 6.1.1.4' 
 'H'  'H'   0.0000   0.0000 
 'International Tables Vol C Tables 4.2.6.8 and 6.1.1.4' 
 'O'  'O'   0.0106   0.0060 
 'International Tables Vol C Tables 4.2.6.8 and 6.1.1.4' 
 'S'  'S'   0.1246   0.1234 
 'International Tables Vol C Tables 4.2.6.8 and 6.1.1.4' 
 
_symmetry_cell_setting            'Triclinic'
_symmetry_space_group_name_H-M     'P-1'
 
loop_ 
 _symmetry_equiv_pos_as_xyz 
 'x, y, z' 
 '-x, -y, -z' 
 
_cell_length_a                    5.5396(7) 
_cell_length_b                    10.8167(13) 
_cell_length_c                    17.091(2) 
_cell_angle_alpha                 72.010(6) 
_cell_angle_beta                  81.369(6) 
_cell_angle_gamma                 78.119(6) 
_cell_volume                      949.0(2) 
_cell_formula_units_Z             2 
_cell_measurement_temperature     296(2) 
_cell_measurement_reflns_used     ? 
_cell_measurement_theta_min       ? 
_cell_measurement_theta_max       ? 
 
_exptl_crystal_description        block 
_exptl_crystal_colour             colorless 
_exptl_crystal_size_max           0.4 
_exptl_crystal_size_mid           0.3
_exptl_crystal_size_min           0.2
_exptl_crystal_density_meas       ? 
_exptl_crystal_density_diffrn     1.261 
_exptl_crystal_density_method     'not measured' 
_exptl_crystal_F_000              380 
_exptl_absorpt_coefficient_mu     0.184 
_exptl_absorpt_correction_type    'none' 
_exptl_absorpt_correction_T_min   ? 
_exptl_absorpt_correction_T_max   ? 
_exptl_absorpt_process_details    ? 
 
_exptl_special_details 
; 
 ? 
; 
 
_diffrn_ambient_temperature       296(2) 
_diffrn_radiation_wavelength      0.71073 
_diffrn_radiation_type            MoK\a 
_diffrn_radiation_source          'fine-focus sealed tube' 
_diffrn_radiation_monochromator   graphite 
_diffrn_measurement_device_type   ? 
_diffrn_measurement_method        ? 
_diffrn_detector_area_resol_mean  ? 
_diffrn_standards_number          ? 
_diffrn_standards_interval_count  ? 
_diffrn_standards_interval_time   ? 
_diffrn_standards_decay_%         ? 
_diffrn_reflns_number             11536 
_diffrn_reflns_av_R_equivalents   0.1192 
_diffrn_reflns_av_sigmaI/netI     0.0916 
_diffrn_reflns_limit_h_min        -6 
_diffrn_reflns_limit_h_max        6 
_diffrn_reflns_limit_k_min        -12 
_diffrn_reflns_limit_k_max        12 
_diffrn_reflns_limit_l_min        -20 
_diffrn_reflns_limit_l_max        20 
_diffrn_reflns_theta_min          1.26 
_diffrn_reflns_theta_max          25.00 
_reflns_number_total              3276 
_reflns_number_gt                 1744 
_reflns_threshold_expression      >2sigma(I) 
 
_computing_data_collection        ? 
_computing_cell_refinement        ? 
_computing_data_reduction         ? 
_computing_structure_solution     'SHELXS-97 (Sheldrick, 1990)' 
_computing_structure_refinement   'SHELXL-97 (Sheldrick, 1997)' 
_computing_molecular_graphics     ? 
_computing_publication_material   ? 
 
_refine_special_details 
; 
 Refinement of F^2^ against ALL reflections.  The weighted R-factor wR and 
 goodness of fit S are based on F^2^, conventional R-factors R are based 
 on F, with F set to zero for negative F^2^. The threshold expression of 
 F^2^ > 2sigma(F^2^) is used only for calculating R-factors(gt) etc. and is 
 not relevant to the choice of reflections for refinement.  R-factors based 
 on F^2^ are statistically about twice as large as those based on F, and R- 
 factors based on ALL data will be even larger. 
; 
 
_refine_ls_structure_factor_coef  Fsqd  
_refine_ls_matrix_type            full 
_refine_ls_weighting_scheme       calc  
_refine_ls_weighting_details 
 'calc w=1/[\s^2^(Fo^2^)+(0.1000P)^2^+0.3714P] where P=(Fo^2^+2Fc^2^)/3' 
_atom_sites_solution_primary      direct 
_atom_sites_solution_secondary    difmap 
_atom_sites_solution_hydrogens    geom 
_refine_ls_hydrogen_treatment     mixed 
_refine_ls_extinction_method      none 
_refine_ls_extinction_coef        ? 
_refine_ls_number_reflns          3276 
_refine_ls_number_parameters      236 
_refine_ls_number_restraints      0 
_refine_ls_R_factor_all           0.1117 
_refine_ls_R_factor_gt            0.0703 
_refine_ls_wR_factor_ref          0.2258 
_refine_ls_wR_factor_gt           0.2114 
_refine_ls_goodness_of_fit_ref    1.007 
_refine_ls_restrained_S_all       1.007 
_refine_ls_shift/su_max           0.000 
_refine_ls_shift/su_mean          0.000 
 
loop_ 
 _atom_site_label 
 _atom_site_type_symbol 
 _atom_site_fract_x 
 _atom_site_fract_y 
 _atom_site_fract_z 
 _atom_site_U_iso_or_equiv 
 _atom_site_adp_type 
 _atom_site_occupancy 
 _atom_site_symmetry_multiplicity 
 _atom_site_calc_flag 
 _atom_site_refinement_flags 
 _atom_site_disorder_assembly 
 _atom_site_disorder_group 
S1 S 0.3696(2) 0.20054(12) 0.33994(8) 0.0771(5) Uani 1 1 d . . . 
C1 C 0.5600(8) 0.0434(4) 0.3620(3) 0.0634(11) Uani 1 1 d . . . 
C4 C 0.8297(14) -0.2088(6) 0.4043(4) 0.108(2) Uani 1 1 d . . . 
H4 H 0.9221 -0.2935 0.4172 0.130 Uiso 1 1 calc R . . 
C2 C 0.5075(15) -0.0516(6) 0.3371(4) 0.134(3) Uani 1 1 d . . . 
H2 H 0.3782 -0.0337 0.3041 0.160 Uiso 1 1 calc R . . 
C5 C 0.8813(17) -0.1162(7) 0.4301(6) 0.168(4) Uani 1 1 d . . . 
H5 H 1.0095 -0.1359 0.4638 0.202 Uiso 1 1 calc R . . 
C3 C 0.644(2) -0.1774(7) 0.3600(6) 0.174(4) Uani 1 1 d . . . 
H3 H 0.6002 -0.2427 0.3427 0.209 Uiso 1 1 calc R . . 
C6 C 0.7491(15) 0.0102(6) 0.4082(6) 0.170(4) Uani 1 1 d . . . 
H6 H 0.7935 0.0744 0.4264 0.204 Uiso 1 1 calc R . . 
C7 C 0.6048(7) 0.2971(4) 0.1832(3) 0.0537(10) Uani 1 1 d . . . 
C12 C 0.8216(8) 0.2346(4) 0.1513(3) 0.0647(11) Uani 1 1 d . . . 
H12 H 0.9543 0.1989 0.1835 0.078 Uiso 1 1 calc R . . 
C10 C 0.6551(8) 0.2768(4) 0.0234(3) 0.0689(12) Uani 1 1 d . . . 
H10 H 0.6721 0.2700 -0.0302 0.083 Uiso 1 1 calc R . . 
C11 C 0.8436(9) 0.2246(5) 0.0717(3) 0.0754(13) Uani 1 1 d . . . 
H11 H 0.9906 0.1812 0.0512 0.091 Uiso 1 1 calc R . . 
C8 C 0.4138(8) 0.3491(4) 0.1332(3) 0.0683(12) Uani 1 1 d . . . 
H8 H 0.2653 0.3913 0.1537 0.082 Uiso 1 1 calc R . . 
C9 C 0.4374(9) 0.3401(5) 0.0541(3) 0.0735(13) Uani 1 1 d . . . 
H9 H 0.3064 0.3768 0.0212 0.088 Uiso 1 1 calc R . . 
C13 C 0.5828(7) 0.3044(4) 0.2716(3) 0.0547(10) Uani 1 1 d . . . 
H13 H 0.7470 0.2741 0.2922 0.066 Uiso 1 1 calc R . . 
C16 C 0.5644(7) 0.6802(4) 0.1896(2) 0.0478(9) Uani 1 1 d . . . 
C15 C 0.6672(7) 0.5369(4) 0.2259(2) 0.0484(9) Uani 1 1 d . . . 
C17 C 0.3260(7) 0.7388(4) 0.2101(3) 0.0590(11) Uani 1 1 d . . . 
H17 H 0.2159 0.6876 0.2454 0.071 Uiso 1 1 calc R . . 
C18 C 0.2518(8) 0.8730(4) 0.1782(3) 0.0686(12) Uani 1 1 d . . . 
H18 H 0.0919 0.9120 0.1921 0.082 Uiso 1 1 calc R . . 
C20 C 0.6491(10) 0.8921(5) 0.1039(3) 0.0793(14) Uani 1 1 d . . . 
H20 H 0.7566 0.9437 0.0675 0.095 Uiso 1 1 calc R . . 
C19 C 0.4124(10) 0.9484(5) 0.1263(3) 0.0805(14) Uani 1 1 d . . . 
H19 H 0.3617 1.0389 0.1058 0.097 Uiso 1 1 calc R . . 
C14 C 0.4875(7) 0.4459(4) 0.2776(2) 0.0536(10) Uani 1 1 d . . . 
H14 H 0.3251 0.4775 0.2558 0.064 Uiso 1 1 calc R . . 
C21 C 0.7243(8) 0.7578(4) 0.1364(3) 0.0610(11) Uani 1 1 d . . . 
H21 H 0.8845 0.7193 0.1222 0.073 Uiso 1 1 calc R . . 
O1 O 0.8781(5) 0.4972(3) 0.2179(2) 0.0724(9) Uani 1 1 d . . . 
O2 O 0.2733(6) 0.5080(3) 0.3945(2) 0.0902(11) Uani 1 1 d . . . 
C22 C 0.4620(8) 0.4528(4) 0.3679(3) 0.0647(12) Uani 1 1 d . . . 
C23 C 0.6810(9) 0.3970(5) 0.4163(3) 0.0900(16) Uani 1 1 d . . . 
H23A H 0.6892 0.4517 0.4503 0.135 Uiso 1 1 calc R . . 
H23B H 0.8290 0.3939 0.3791 0.135 Uiso 1 1 calc R . . 
H23C H 0.6661 0.3095 0.4506 0.135 Uiso 1 1 calc R . . 
 
loop_ 
 _atom_site_aniso_label 
 _atom_site_aniso_U_11 
 _atom_site_aniso_U_22 
 _atom_site_aniso_U_33 
 _atom_site_aniso_U_23 
 _atom_site_aniso_U_13 
 _atom_site_aniso_U_12 
S1 0.0732(9) 0.0590(8) 0.0867(9) -0.0125(6) 0.0127(6) -0.0110(6) 
C1 0.080(3) 0.050(3) 0.056(3) -0.009(2) -0.001(2) -0.012(2) 
C4 0.145(6) 0.063(4) 0.093(4) -0.018(3) 0.007(4) 0.016(4) 
C2 0.208(7) 0.081(4) 0.135(6) -0.062(4) -0.091(5) 0.025(4) 
C5 0.193(8) 0.076(5) 0.227(10) -0.015(6) -0.117(7) 0.019(5) 
C3 0.294(11) 0.082(5) 0.176(8) -0.077(5) -0.117(8) 0.036(6) 
C6 0.196(8) 0.065(4) 0.270(11) -0.036(5) -0.145(8) 0.005(5) 
C7 0.046(2) 0.047(2) 0.071(3) -0.024(2) -0.0019(19) -0.0054(17) 
C12 0.054(3) 0.071(3) 0.068(3) -0.027(2) -0.007(2) 0.003(2) 
C10 0.074(3) 0.074(3) 0.065(3) -0.030(2) -0.003(2) -0.014(2) 
C11 0.065(3) 0.085(3) 0.080(3) -0.043(3) -0.001(2) 0.005(2) 
C8 0.052(3) 0.079(3) 0.079(3) -0.040(3) -0.004(2) 0.003(2) 
C9 0.069(3) 0.078(3) 0.079(3) -0.031(3) -0.018(2) -0.002(2) 
C13 0.047(2) 0.046(2) 0.070(3) -0.022(2) 0.0012(18) -0.0018(16) 
C16 0.048(2) 0.051(2) 0.047(2) -0.0175(18) -0.0074(16) -0.0084(17) 
C15 0.050(3) 0.047(2) 0.052(2) -0.0194(18) -0.0018(17) -0.0083(18) 
C17 0.058(3) 0.052(3) 0.067(3) -0.018(2) -0.009(2) -0.0057(19) 
C18 0.065(3) 0.056(3) 0.084(3) -0.021(2) -0.019(2) 0.002(2) 
C20 0.085(4) 0.066(3) 0.081(3) -0.003(3) -0.009(3) -0.026(3) 
C19 0.089(4) 0.053(3) 0.096(4) -0.011(3) -0.031(3) -0.006(3) 
C14 0.048(2) 0.049(2) 0.062(3) -0.0192(19) -0.0045(18) -0.0023(17) 
C21 0.061(3) 0.058(3) 0.064(3) -0.016(2) -0.005(2) -0.012(2) 
O1 0.0515(19) 0.0633(19) 0.096(2) -0.0215(17) 0.0025(15) -0.0057(14) 
O2 0.084(2) 0.101(3) 0.075(2) -0.034(2) 0.0087(17) 0.009(2) 
C22 0.068(3) 0.061(3) 0.062(3) -0.023(2) 0.006(2) -0.003(2) 
C23 0.095(4) 0.101(4) 0.075(3) -0.035(3) -0.019(3) 0.006(3) 
 
_geom_special_details 
; 
 All esds (except the esd in the dihedral angle between two l.s. planes) 
 are estimated using the full covariance matrix.  The cell esds are taken 
 into account individually in the estimation of esds in distances, angles 
 and torsion angles; correlations between esds in cell parameters are only 
 used when they are defined by crystal symmetry.  An approximate (isotropic) 
 treatment of cell esds is used for estimating esds involving l.s. planes. 
; 
 
loop_ 
 _geom_bond_atom_site_label_1 
 _geom_bond_atom_site_label_2 
 _geom_bond_distance 
 _geom_bond_site_symmetry_2 
 _geom_bond_publ_flag 
S1 C1 1.769(4) . ? 
S1 C13 1.828(4) . ? 
C1 C2 1.323(7) . ? 
C1 C6 1.330(8) . ? 
C4 C3 1.296(9) . ? 
C4 C5 1.308(10) . ? 
C2 C3 1.383(9) . ? 
C5 C6 1.378(9) . ? 
C7 C12 1.375(5) . ? 
C7 C8 1.376(6) . ? 
C7 C13 1.524(6) . ? 
C12 C11 1.384(6) . ? 
C10 C11 1.349(6) . ? 
C10 C9 1.375(6) . ? 
C8 C9 1.371(6) . ? 
C13 C14 1.543(5) . ? 
C16 C21 1.381(5) . ? 
C16 C17 1.387(5) . ? 
C16 C15 1.504(5) . ? 
C15 O1 1.162(4) . ? 
C15 C14 1.530(5) . ? 
C17 C18 1.380(6) . ? 
C18 C19 1.363(7) . ? 
C20 C19 1.378(7) . ? 
C20 C21 1.384(6) . ? 
C14 C22 1.552(6) . ? 
O2 C22 1.194(4) . ? 
C22 C23 1.487(6) . ? 
 
loop_ 
 _geom_angle_atom_site_label_1 
 _geom_angle_atom_site_label_2 
 _geom_angle_atom_site_label_3 
 _geom_angle 
 _geom_angle_site_symmetry_1 
 _geom_angle_site_symmetry_3 
 _geom_angle_publ_flag 
C1 S1 C13 101.56(19) . . ? 
C2 C1 C6 116.2(5) . . ? 
C2 C1 S1 120.2(4) . . ? 
C6 C1 S1 123.4(4) . . ? 
C3 C4 C5 117.0(6) . . ? 
C1 C2 C3 120.3(6) . . ? 
C4 C5 C6 121.1(7) . . ? 
C4 C3 C2 123.2(6) . . ? 
C1 C6 C5 122.1(7) . . ? 
C12 C7 C8 117.9(4) . . ? 
C12 C7 C13 119.5(4) . . ? 
C8 C7 C13 122.6(3) . . ? 
C7 C12 C11 120.4(4) . . ? 
C11 C10 C9 119.4(4) . . ? 
C10 C11 C12 121.0(4) . . ? 
C9 C8 C7 121.5(4) . . ? 
C8 C9 C10 119.8(4) . . ? 
C7 C13 C14 112.2(3) . . ? 
C7 C13 S1 112.0(3) . . ? 
C14 C13 S1 106.9(2) . . ? 
C21 C16 C17 119.0(4) . . ? 
C21 C16 C15 117.1(3) . . ? 
C17 C16 C15 123.8(4) . . ? 
O1 C15 C16 121.1(3) . . ? 
O1 C15 C14 120.8(3) . . ? 
C16 C15 C14 118.0(3) . . ? 
C18 C17 C16 120.1(4) . . ? 
C19 C18 C17 120.1(4) . . ? 
C19 C20 C21 119.1(4) . . ? 
C18 C19 C20 120.8(4) . . ? 
C15 C14 C13 109.7(3) . . ? 
C15 C14 C22 108.3(3) . . ? 
C13 C14 C22 112.1(3) . . ? 
C16 C21 C20 120.8(4) . . ? 
O2 C22 C23 122.5(4) . . ? 
O2 C22 C14 119.2(4) . . ? 
C23 C22 C14 118.2(4) . . ? 
 
_diffrn_measured_fraction_theta_max    0.976 
_diffrn_reflns_theta_full              25.00 
_diffrn_measured_fraction_theta_full   0.976 
_refine_diff_density_max    0.449 
_refine_diff_density_min   -0.278 
_refine_diff_density_rms    0.083 
